# Supplementary material for: Expression profiles analysis of long non-coding RNAs identified novel lncRNA biomarkers with predictive value in outcome of cutaneous melanoma
Source: PubMed Central journal article supplement (PMC5652813; doi:10.18632/oncotarget.20780), 2017-09-08
Supplement: oncotarget-08-77761-s001.pdf [file oncotarget-08-77761-s001.pdf]

# Expression profiles analysis of long non-coding RNAs identified novel lncRNA biomarkers with predictive value in outcome of cutaneous melanoma

## SUPPLEMENTARY MATERIALS

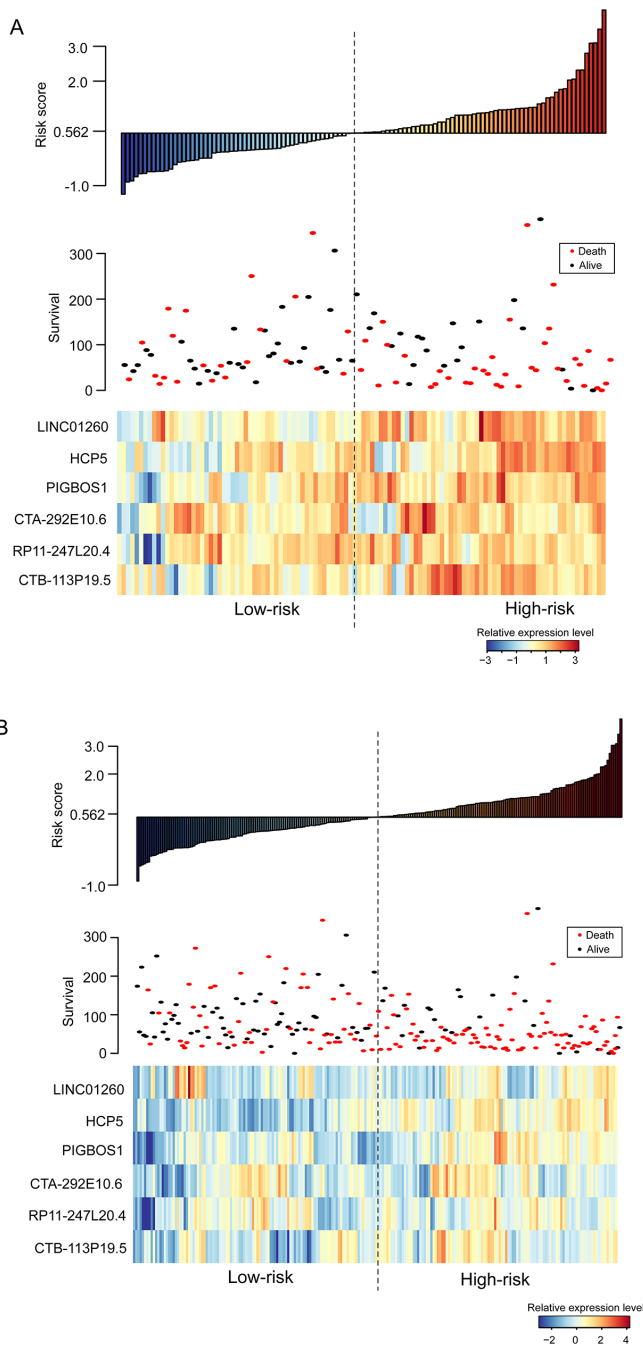

**Supplementary Figure 1:** Distribution of risk scores, patient survival status and lncRNA expression map in the validation cohort (A) and the entire TCGA cohort (B).
